# Supplementary material for: Aging Aggravated Liver Ischemia And Reperfusion Injury By Promoting Oxidized mtDNA Mediated-Macrophage Pyroptosis Through Acetylated MCU-Dependent Calcium Uptake
Source: Research Square preprint supplement (doi:10.21203/rs.3.rs-6717688/v1), 2025-06-05

## Supplementary figure legends

### Fig. S1

**A.** Isolation and extraction of whole cell lysate, mitochondria, and cytoplasm from liver macrophages. **B-C.** AML12 cells were treated with Etoposide (75  $\mu$ M) or equal volume of DMSO for 3 days to simulate as aged or young hepatocytes in vitro, respectively. The levels of P16 and P21 in AML12 cells with or without etoposide were measured by WB. **D.** The protocol of in vitro experiments for co-culture of AML12 cells and RAW264.7 cells. RAW264.7 cells were co-cultured with the supernatant from normal or aged AML12 cells. **E.** Isolation and extraction of whole cell lysate, mitochondria, and cytoplasm from RAW264.7 cells. All data are shown as the mean  $\pm$  SD (n=6). \*\*\* $P$  < 0.001, \*\* $P$  < 0.01 and \* $P$  < 0.05.

### Fig. S2

RAW264.7 cells were co-cultured with the supernatant from normal or aged AML12 cells in the absence or presence of BAPTA-AM (10  $\mu$ M) for 24 h followed by treatment with H/R: Fluo4-am detects intracellular calcium levels. (n=6)

### Fig. S3

RAW264.7 cells were infected with Lv-MCU-WT or Lv-MCU-K331R and co-cultured with the supernatant from normal or aged AML12 cells for 24 h, followed by treatment with H/R: Co-IP assay was performed to determine MCU acetylation. (n=6)

**Fig. S1**

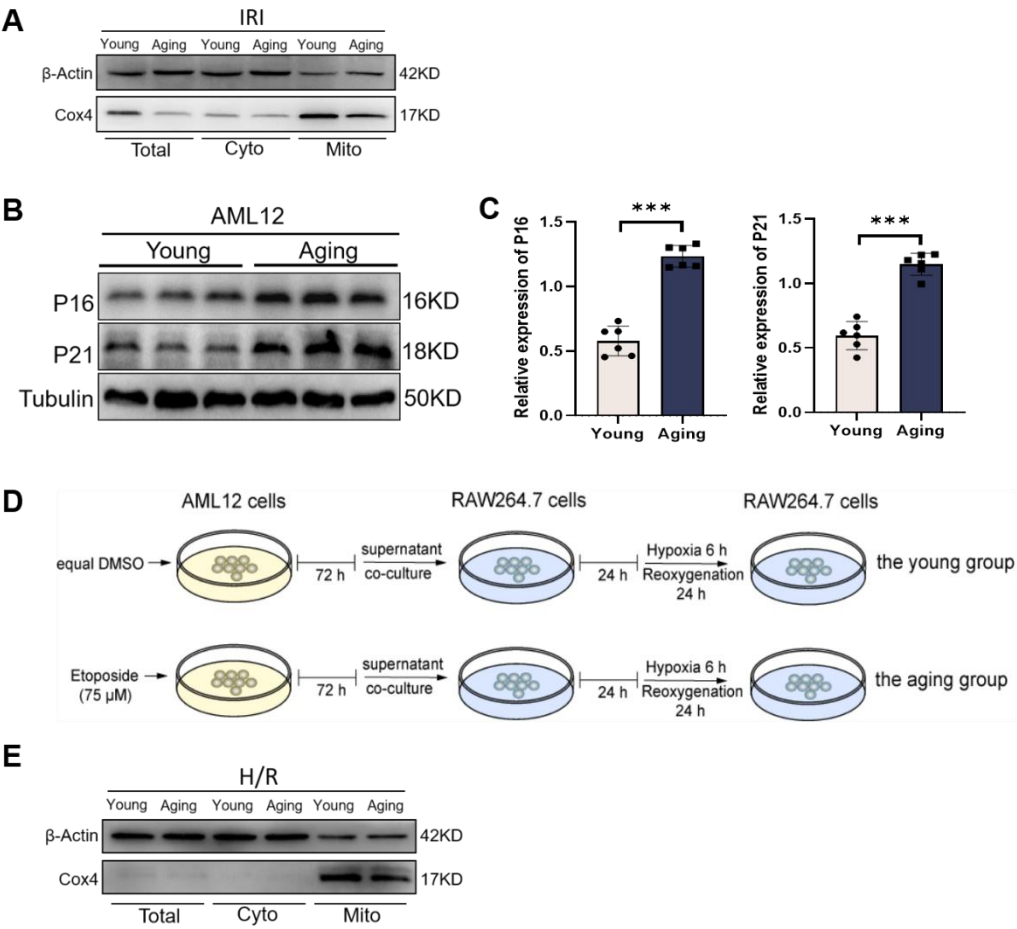

Fig. S2

A

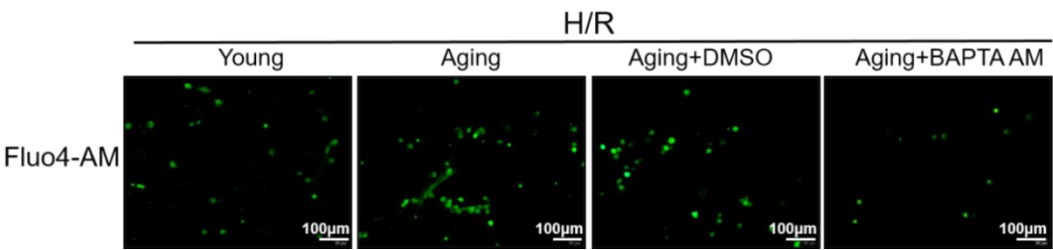

**Fig. S3**

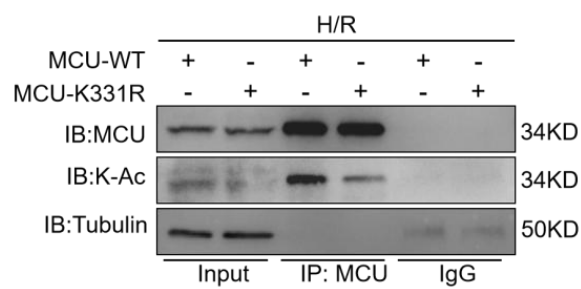

Supplement: Supplementary file 1 [file 6708dac730182544fdf58c0c.pdf]
